# Supplementary material for: Global patterns of nitrogen saturation in forests
Source: Research Square preprint supplement (doi:10.21203/rs.3.rs-3559857/v1), 2023-11-23
Supplement: Supplementary file 1 [file ee92364b8494c4d01b2764bf.pdf]

1 **Supplementary materials for**

2  
3 **Global patterns of nitrogen saturation in forests**

4  
5 Xiaoyu Cen, Nianpeng He, Kevin Van Sundert, César Terrer, Kailiang Yu, Mingxu Li, Li Xu, Liyin He,  
6 Klaus Butterbach-Bahl

7  
8  
9 Corresponding author: Nianpeng He, email: [henp@igsnrr.ac.cn](mailto:henp@igsnrr.ac.cn)

10  
11  
12 **The PDF file includes:**

13  
14 Supplementary Text S1 to S5  
15 Figs. S1 to S15  
16 Tables S1 to S5

17  
18 **Other Supplementary Materials for this manuscript include the following:**

19  
20 Data S1 to S7  
21 Code S1  
22

## Supplementary Texts

### Text S1. Indicators of nitrogen saturation status

In the 1980s, European researchers firstly came up with the concept of “nitrogen saturation”<sup>1,2</sup>. It refers to a status when forest ecosystems cannot retain more nitrogen (N), so that additional N input are almost entirely lost via leaching or gaseous emission. Since then, researchers identified different variables to indicate N limitation or saturation status of forests (Fig. S10).

Atmospheric N deposition is a driving force of change from N-limited to N-saturated status. Therefore, forests under higher **N deposition** are more likely to become N-saturated<sup>3</sup>. After N enters forest soils, the relative enrichment of N tend to lower the **soil C:N ratio**<sup>4</sup>. Also, the different effects of N deposition on acid anion and base cation contents may lower **soil pH**<sup>5</sup>, leading to soil acidification. Lowered soil pH will, on one hand, decrease the dissolved organic carbon content in soil. On the other hand, input N stimulates the mineralization of soil organic carbon (SOC) by microbes and decreases SOC content. Both of the processes result in lowered **SOC content** in soils<sup>6</sup>. Meanwhile, soil properties influence the retainment of N and the preferential pathway of environmental N loss, i.e., either hydrological or gaseous. For example, soils with higher **clay content** are less permeable. Because less N would be leached out, such soils are more likely to become N-saturated and show higher rates of gaseous N losses. Some researchers also proposed that multiple soil properties could be integrated to form a new indicator, which may better reveal forests in N limitation or N saturation status<sup>7</sup>. The relationship between such an integrative indicator and forest N saturation status, however, comes from observations used to derive the indicator, rather than from underlying mechanisms. Therefore, the parameters used to derive the indicator and their weights may change when different observational data were used.

By definition, N loss from forests can indicate forests reaching N saturation. From the 1990s to the 2000s, **leaching loss of N** was a widely used indicator of forests shifting from N-limited to N-saturated status<sup>8,9</sup>. Progressively, the interpretation of the indicator changes from “the occurrence of N leaching indicates N saturation” to “high N leaching rate indicates N saturation”, and then to “high N leaching relative to N input indicates N saturation”<sup>10</sup>. The different interpretation of the indicator leads to different sampling approaches applied. In some studies, samples were taken from nearby water bodies, whereas in some other studies, deep soil solutions were sampled. The former has an advantage of reducing the random errors when sampling spatially heterogenous soils, whereas the latter is more advantageous in connecting N leaching with N input occurring in the same place. However, the differences in sampling approaches prohibit the site-level N leaching data from being combined to reveal N saturation status of forests on regional scale.

Besides, the structure and function of plants can also indicate N saturation status in forests. For instance, the presence or absence of some **signal species** (which are sensitive to changes in soil nutrients) can reflect the change in forest N saturation status to some extent<sup>11</sup>. When forests become N-saturated, the growth of plants become limited by other resources than N. Additional N input can no longer enhance **plant productivity**, which may even suppress plant growth and decrease productivity by changing soil properties. Also, the **resorption rate of N** may decrease relative to that of other nutrients, because plants in N-saturated forests need other nutrients more than N<sup>12</sup>. However, due to the difficulty in investigating plant functional traits, there is a lack of regional dataset derived from a universal sampling method. Therefore, plant functional traits could barely be used to indicate N saturation status on regional scale.

**N isotope ratio** ( $\delta^{15}\text{N}$ ) measured from terrestrial samples (foliar, tree ring, sediment) has been a good, integrated indicator of N cycling processes, because of the isotope fractionation effect (heavier isotope gradually accumulate and enrich in organisms and soils, in the processes of N transformation and transport). In ecosystems where N availability is low, organisms tend to use N more conservatively, bypassing or suppressing N transformation processes where N could potentially be lost; whereas in ecosystems with high N availability, more N transformation processes could be involved, therefore the fractionation effect would be more prominent in high-N than in low-N-availability ecosystems. This is the reason why researchers could use N isotope ratio to indicate the temporal trend of N availability in terrestrial ecosystems over a large scale<sup>13,14</sup>.

73 But restrictions may apply when using N isotope ratio to indicate the spatial variation in N  
74 availability (N limitation/saturation status in our study). Because N sources differ among forests – some  
75 rely on local N, while some use deposited exogenous N as the major source. In the latter case, measured  
76 foliar and soil N isotope ratio may be influenced by the N isotope signature of the deposited N<sup>15</sup>, not  
77 necessarily reflective of the N transformation processes and availability of N in the local ecosystem.  
78 Forests, especially those close to human settlements, are heavily influenced by N deposition. It is  
79 therefore problematic to rely on N isotope ratio to indicate the spatially varying N availability in forests,  
80 where the different N sources may be confounding<sup>16,17</sup>.  
81  
82

**Text S2. Estimating the change point of the relationship between N input and soil N<sub>2</sub>O emission, so that threshold between low and high N input levels was determined**

Soil N<sub>2</sub>O emission rate ( $R_{N_2O}$ ) responds almost linearly to low N input (including N deposition and low N addition). High N input, however, may change the ecosystem properties and induce a non-linear response<sup>18</sup>. To estimate the point at which the relationship between N input rate and  $R_{N_2O}$  changes, we conducted a segmented regression analysis with compiled data from N addition experiments (N<sub>2</sub>O\_exp dataset; Data S1).

Only a few observations have N input rates above 400 kgN ha<sup>-1</sup> yr<sup>-1</sup>, the  $R_{N_2O}$  values of which show a high variation. Referring to previous research<sup>19-23</sup> (Table S3), the change point of the relationship between N input rate and  $R_{N_2O}$  is unlikely to exceed 400 kgN ha<sup>-1</sup> yr<sup>-1</sup>. Therefore, we filtered out observations with N input rates above 400 kgN ha<sup>-1</sup> yr<sup>-1</sup>, and conducted a segmented regression (model:  $R_{N_2O} \sim$  N input rate) in R<sup>24</sup> using the “segmented” package<sup>25</sup>. The algorithm can detect a change point (or change points), and apply different linear models to the data below or above the change point(s). We firstly assumed there was one change point, which was estimated to be  $174.70 \pm 19.73$  kgN ha<sup>-1</sup> yr<sup>-1</sup> ( $n = 532$ ,  $R^2 = 0.20$ ,  $p < 0.001$ ).

Considering the possibility of having multiple change points, we also constructed segmented regression models when assuming 2–4 change points exist. Then we calculated Bayes factors (BF) based on Akaike's An Information Criterion (BIC) of each model, so we can evaluate which model is better<sup>26</sup>. The BFs indicate that there are >95% probabilities that the model with one change point is better than models with multiple change points (Table S4).

To sum up, our data showed that there is one change point in the linear relationship between N input rate and  $R_{N_2O}$ , which is  $174.70 \pm 19.73$  kgN ha<sup>-1</sup> yr<sup>-1</sup> (Fig. S11). We also referred to the change points used or estimated in previous research (Table S3), and conservatively determined the N addition rates below 150 kgN ha<sup>-1</sup> yr<sup>-1</sup> to be “low” N input in this study.

### Text S3. Calculating the sensitivity of soil N<sub>2</sub>O emission to N deposition ( $s_N$ ) using N cycle parameters

Using data from N addition experiments (Table S1), we built a generalized linear model to simulate the sensitivity ( $s_N$ ) of soil N<sub>2</sub>O emission ( $R_{N_2O}$ ) to N deposition ( $N_{depo}$ ) of global forests. Due to the limited N addition experiment data available, we could not reserve part of the data for model validation. Instead, we calculated  $s_N$  from other N cycle parameters to validate the model-estimated  $s_N$ .

In a determined ecosystem, we define  $c_1$  to be the sensitivity of total N loss (N leaching and gaseous N emission combined) to N deposition ( $c_1 = \frac{\Delta N_{loss}}{\Delta N_{depo}}$ ; unit: kgN kgN<sup>-1</sup>),  $c_2$  to be sensitivity of N leaching to N deposition ( $c_2 = \frac{\Delta N_{leach}}{\Delta N_{depo}}$ ; unit: kgN kgN<sup>-1</sup>),  $c_3$  to be the nitrification and denitrification end-product ratio ( $c_3 = \frac{R_{N_2O}}{N_{gas}} = \frac{R_{N_2O}}{R_{N_2} + R_{NO} + R_{N_2O}}$ ; unit: kgN<sub>2</sub>O-N kgN<sup>-1</sup>).

First of all, gaseous N loss can be calculated as the nitrogen lost in other pathways than leaching.

$$N_{gas} = N_{loss} - \Delta N_{leach}$$

Thus, the change in soil N<sub>2</sub>O emission rate caused by N deposition change can be calculated from the change in N loss rate and N leaching loss rate.

$$\Delta R_{N_2O} = c_3 \times \Delta N_{gas} = c_3 \times (\Delta N_{loss} - \Delta N_{leach}) = c_3 \times (c_1 - c_2) \times \Delta N_{depo}$$

By definition,  $s_N$  is the change in soil N<sub>2</sub>O emission rate per unit of N deposition change. It can be inferred that

$$s_N = \frac{\Delta R_{N_2O}}{\Delta N_{depo}} = c_3 \times (c_1 - c_2) \quad (\text{Eq. T1})$$

To quantify  $c_1$  and  $c_2$ , we collected data on the total N loss rate ( $N_{loss}$ ) and N leaching rate ( $N_{leach}$ ) data measured in N addition experiments (Data S3; Fig. S12). For literature where the change rate of N pool was provided instead of  $N_{loss}$ ,  $c_1$  was calculated using Eq. T2.

$$c_1 = \frac{\Delta N_{loss}}{\Delta N_{depo}} = \frac{\Delta N_{depo} - \Delta(\Delta N_{pool})}{\Delta N_{depo}} = 1 - \frac{\Delta N_{pool-N_1} - \Delta N_{pool-CK}}{(N_{depo} + N_1) - N_{depo}} \quad (\text{Eq. T2})$$

where  $N_1$  is the rate of artificial N addition in the experiment (kgN ha<sup>-1</sup> yr<sup>-1</sup>);  $N_{depo}$  is the background N deposition rate at the site (kgN ha<sup>-1</sup> yr<sup>-1</sup>);  $\Delta N_{pool-N_1}$  is the change rate of N pool in the N addition plot (kgN ha<sup>-1</sup> yr<sup>-1</sup>);  $\Delta N_{pool-CK}$  is the change rate of N pool in the control plot (kgN ha<sup>-1</sup> yr<sup>-1</sup>). For N addition experiments with multiple N addition levels, we built linear models (model:  $\Delta N_{pool} \sim N$  input rate) to infer the change of  $\Delta N_{pool}$  per unit of N input (i.e.,  $1 - c_1$ ).

Based on the calculated  $c_1$  and  $c_2$ , together with the  $c_3$  from previous research<sup>27</sup>, we calculated the biome-mean  $s_N$  using Eq. T1. Comparing the model-estimated  $s_N$  and the calculated  $s_N$  (Table S5), we found their correlation coefficient (Pearson's  $r$ ) to be 0.998.

**Text S4. Sensitivity of soil N<sub>2</sub>O emission to N deposition ( $s_N$ ) in deciduous broadleaf and needleleaf forests**

Previous research found that the gaseous N product ratio (N<sub>2</sub>O:NO) was higher in beech forest than in spruce forests<sup>28</sup>, which implies that forest type may have a significant effect on the sensitivity of soil N<sub>2</sub>O emission to N deposition ( $s_N$ ).

To test the hypothesis, we compared the  $s_N$  of deciduous broadleaf and needleleaf forests worldwide.  $s_N$  values of global forests were from our constructed model. Forest type information was from a global product<sup>29</sup>. Specifically, for each spatial grid which has a  $s_N$  value, forest type was determined based on the coordinates of the grid. For grids having multiple types of forests (evergreen broadleaf / deciduous broadleaf / needleleaf / mixed), only grids where deciduous broadleaf / needleleaf forests make up more than 50% the grid area was considered to be a deciduous broadleaf / needleleaf forest grid, whereas the other forest grids were considered to be “mixed”. Mixed forest grids were not considered in the following analysis.

On global scale, we found  $s_N$  of deciduous broadleaf forests to be significantly higher than that of needleleaf forests ( $p < 0.001$ ; Fig. S13). On biome scale, however,  $s_N$  of broadleaf forests was significantly higher than that of needleleaf forests in temperate biome only ( $p < 0.001$ ). This is probably because forest type indirectly influences  $s_N$  through the different capabilities of broadleaf and needleleaf forests to retain and utilize deposited N. In temperate biome where atmospheric N deposition rate is particularly high in broadleaf forests, differences in N deposition caused significantly higher  $s_N$  in broadleaf forest than in needleleaf forests.

**Text S5. Using two datasets separately to detect thresholds for the classification of N limitation and saturation status**

We have two independent datasets on the field-observed N-limited or N-saturated status of global forests, which were indicated by N leaching rate (Nleach dataset) and plant growth response to N input (NuLi dataset), respectively. Because the two indicators may point to different stages of N saturation<sup>30</sup>, we firstly used the two datasets separately in the detection of threshold for determining forest N saturation status.

To begin with, we checked whether  $s_N$  could distinguish between the N-limited and N-saturated forests. For the forests in Nleach dataset, the mean  $s_N$  of N-saturated forests were significantly higher than that of N-limited forests, both on global and biome scales (Fig. S14;  $p < 0.001$ ). Also, the mean  $s_N$  of N-saturated forests were significantly higher than that of N-limited forests in NuLi dataset (Fig. S14;  $p < 0.001$ ).

Then, the two datasets were used separately to detect the optimal cutoff value of  $s_N$  between N-limited and N-saturated forests. For forest sites in Nleach dataset, we randomly sampled (with replacement) 10 N-limited forests and 10 N-saturated forests. The 20 sites constitute a sample dataset where N-limited and N-saturated sites were equally represented. For each possible cutoff value of  $s_N$  (within the range of the  $s_N$  values of all samples), forests having higher  $s_N$  than the cutoff value were classified as N-saturated forests, and those having  $s_N$  no higher than the cutoff value were classified as N-limited forests. The classified N limitation or saturation status were compared with the observed status of the sampled forests, and the proportion of successfully classified forests (i.e., to the same category as observed) was the accuracy of the classification. All possible cutoff values of  $s_N$  were tried out (at a precision of  $0.0001 \text{ kgN}_2\text{O-N kgN}^{-1}$ ), and the corresponding accuracies of classification were recorded. The cutoff value(s) that shows the highest accuracy of classification is the optimal cutoff value for the sampled forests. The resampling and detection-of-optimal-cutoff-value processes were repeated for 5000 times. Subsequently, we switched to NuLi dataset and repeated the abovementioned processes for another 5000 times.

By comparing the statistical distribution of the detected optimal cutoff values for the two datasets, we observed a considerable overlap (Fig. S15). That means, the two datasets may point to a similar threshold of  $s_N$  for the classification of N-limited and N-saturated forests. Therefore, we combined the two datasets to enlarge the sample size and detect a universal threshold for classification.

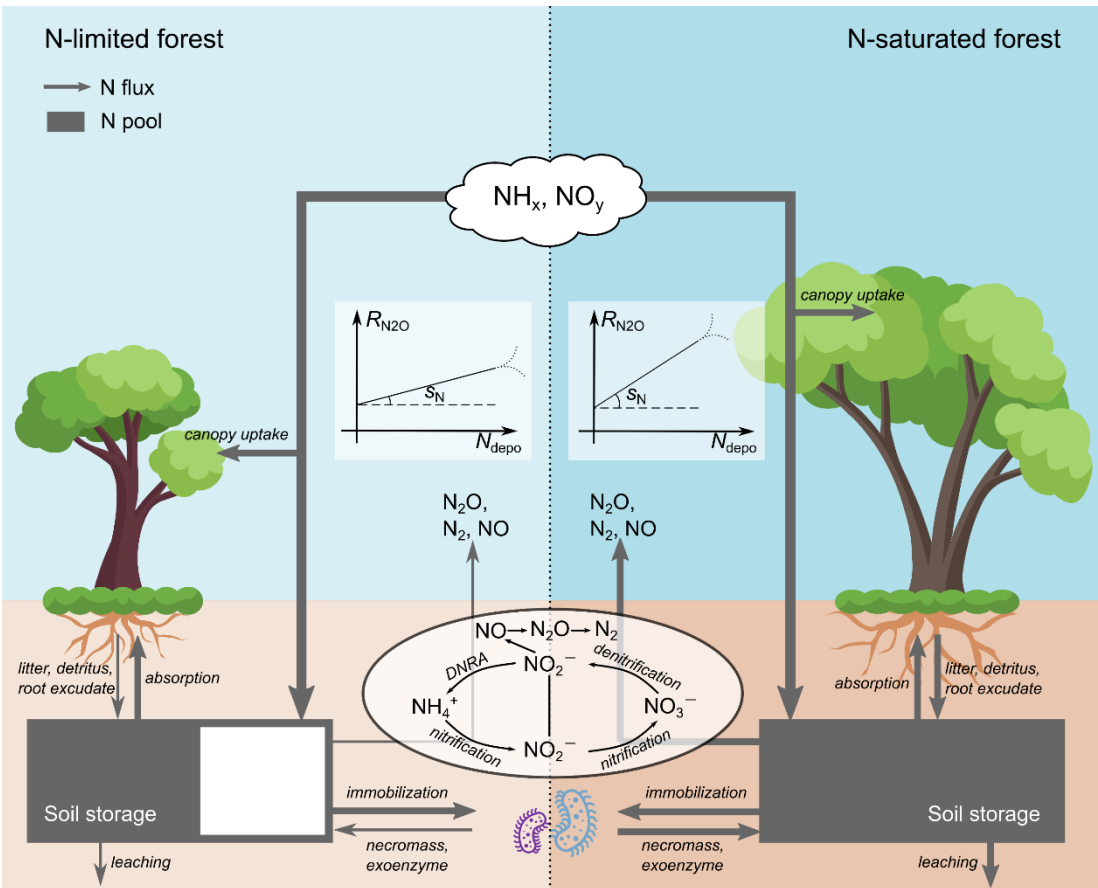

**Fig. S1.** A simplified illustration of the differences in nitrogen (N) flow in N-limited and N-saturated forests.  $\text{NH}_x$ : reduced nitrogen;  $\text{NO}_y$ : oxidized nitrogen;  $R_{\text{N}_2\text{O}}$ : soil  $\text{N}_2\text{O}$  emission rate;  $N_{\text{depo}}$ : atmospheric N deposition rate;  $s_N$ : sensitivity of soil  $\text{N}_2\text{O}$  emission to N deposition; DNRA: dissimilatory nitrate reduction to ammonium.

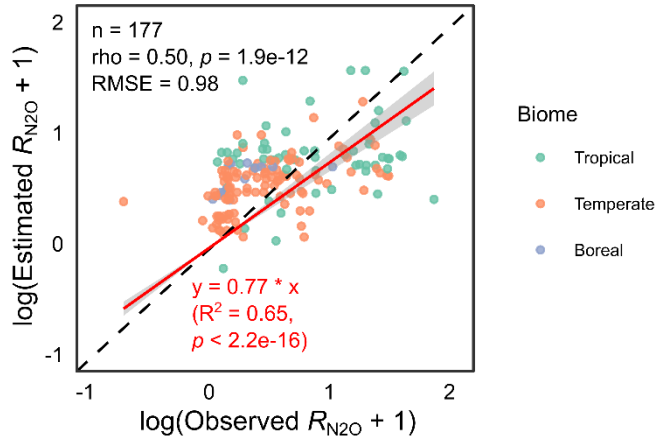

**Fig. S2.** Comparing estimated and observed soil  $N_2O$  emission rates ( $R_{N_2O}$ ). Observations were aggregated to  $0.5^\circ \times 0.5^\circ$  grids to match with the spatial resolution of the environmental factors. Each point represents a grid-year. Points of different colors represent grid-years in different biomes. Because observed and estimated  $R_{N_2O}$  do not follow normal distribution, Spearman's rho was used as the coefficient of correlation between them. For the same reason, observed and estimated  $R_{N_2O}$  were log-transformed before fitting a linear model. The red line and fonts show the fitted linear regression model. Gray shading denotes the standard error. Dashed black line is the 1:1 line.

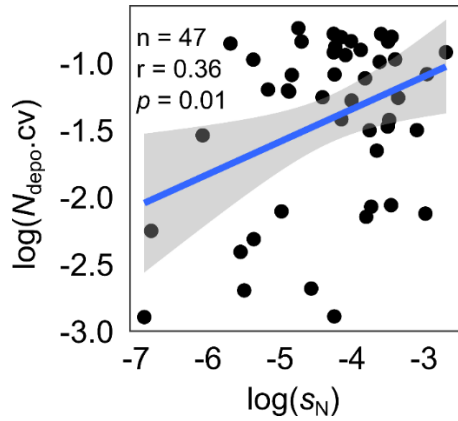

**Fig. S3.** Correlation test between sensitivity of soil  $\text{N}_2\text{O}$  emission to N deposition ( $s_N$ ; log-transformed) and annual variation of N deposition ( $N_{\text{depo.cv}}$ ; log-transformed).  $s_N$  values were calculated using low N input data from global forest experiment sites (Table S1). Temporal data of N deposition were from a published dataset by Ackerman et al.<sup>31</sup>.

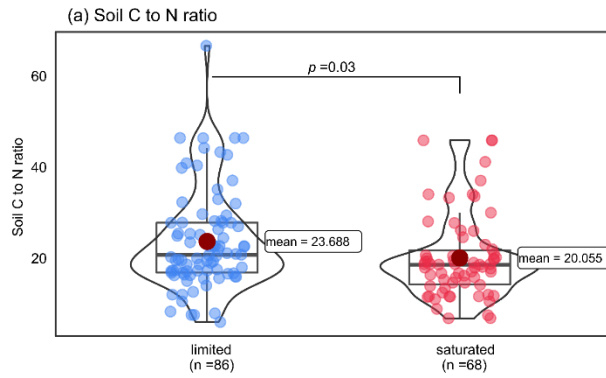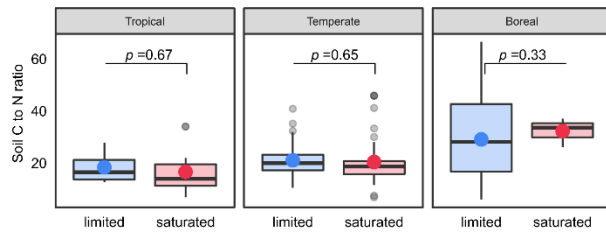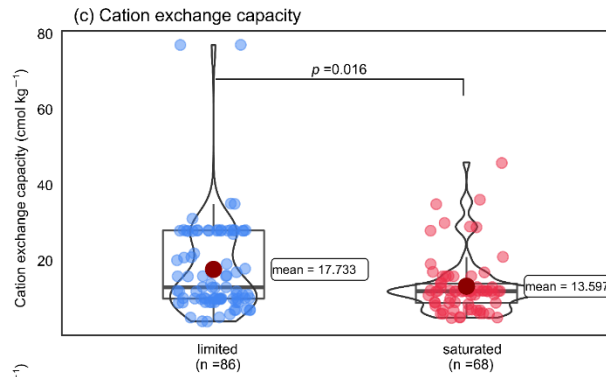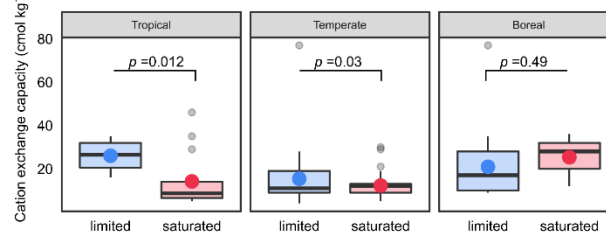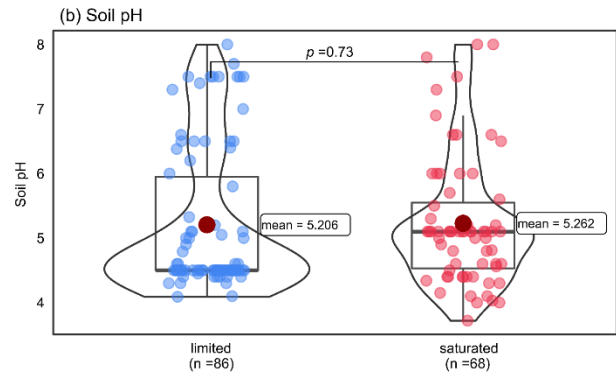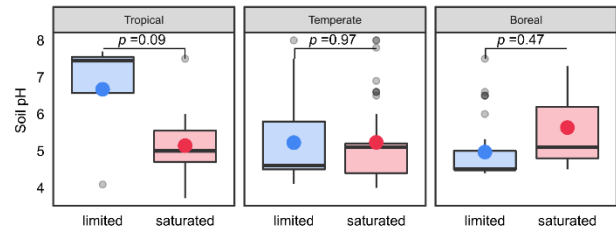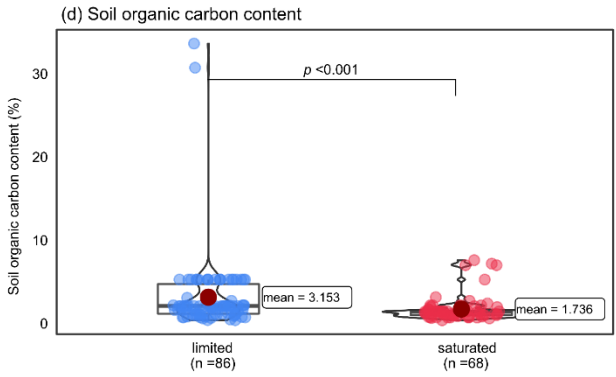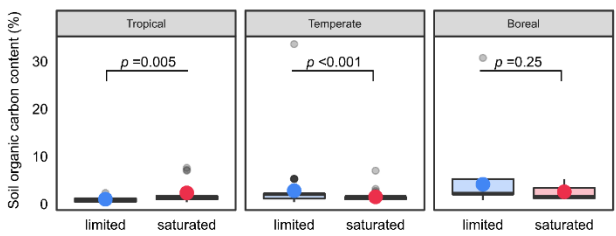

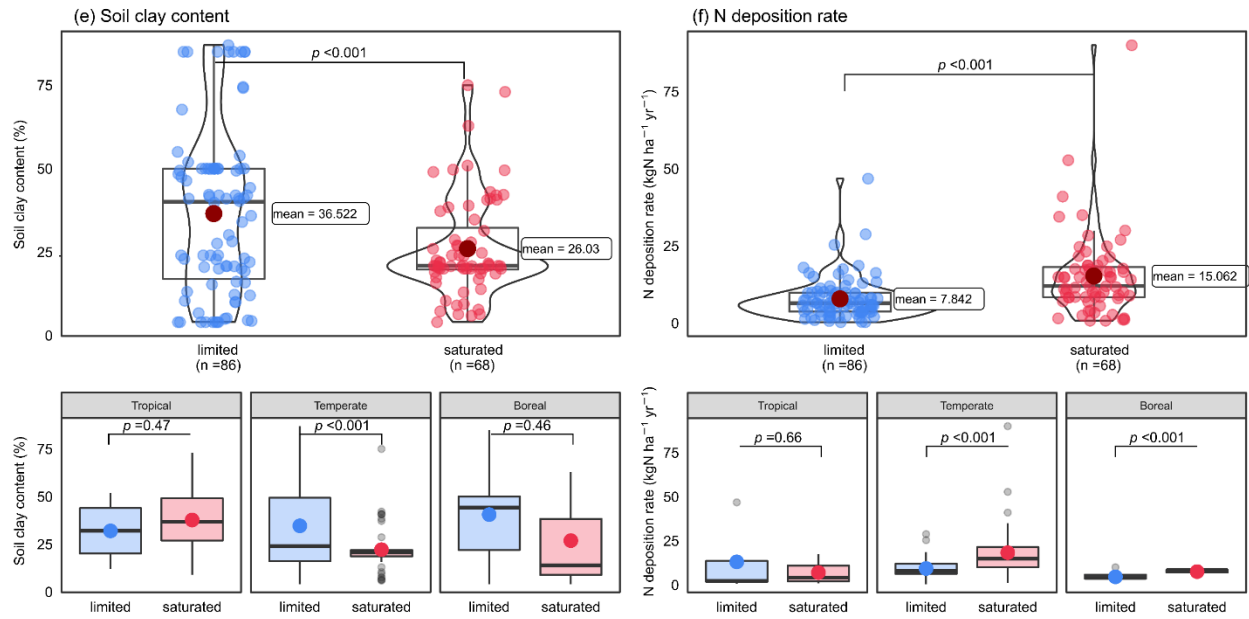

**Fig. S4.** Comparing the performance of different indicators in distinguishing between N-limited and N-saturated forests. Most of the indicators showed reliable performance (significant difference between groups) on global scale, but none of the indicators could have successfully and consistently distinguished between forests in N-limited or N-saturated status across biomes. It is to be noted that these indicators were selected based on the availability of data (from literature or spatial datasets).

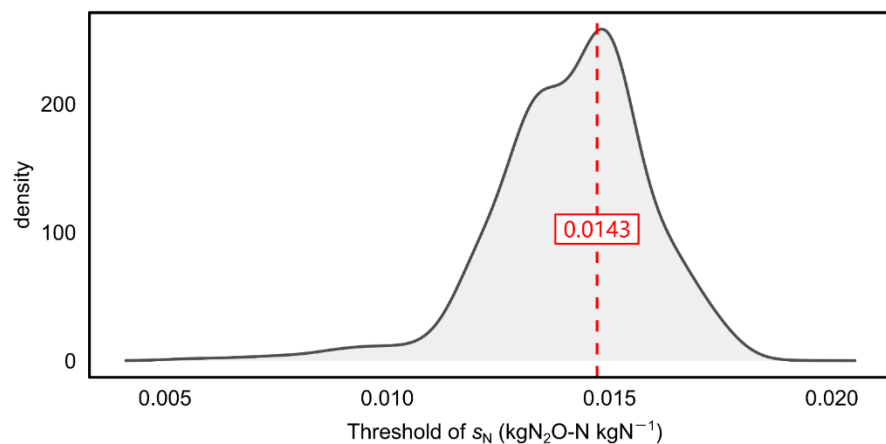

**Fig. S5.** Density curve showing the statistical distribution of optimal cutoff values of  $s_N$ , which were calculated using bootstrap method for 5000 times. The most frequently detected optimal cutoff value (0.0143 kgN<sub>2</sub>O-N kg<sup>-1</sup>), as indicated by the peak of the curve, was used as the optimal threshold.

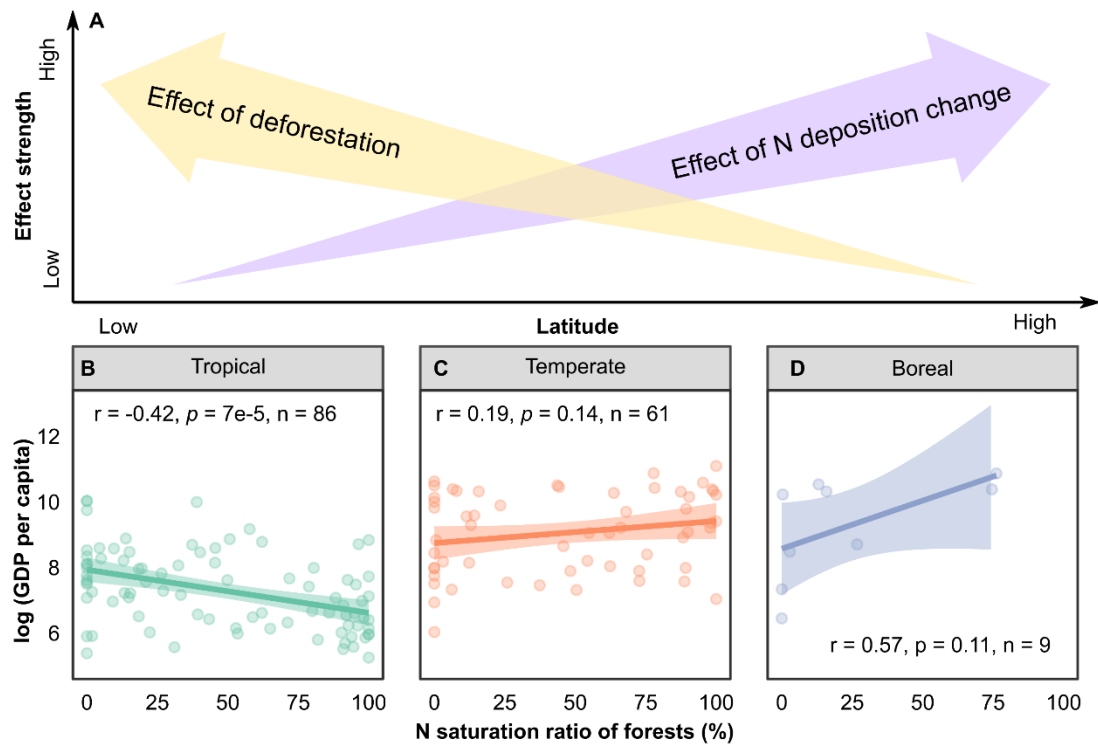

**Fig. S6.** Varying relationships between forest N saturation status and economic development of different countries. (A) Schematic illustration of the stronger negative effect of deforestation (i.e., replacement of mature forests by young forests during economic development) on the N saturation ratio at lower latitudes and the stronger positive effect of N deposition change on the N saturation ratio at higher latitudes. (B-D) Correlations between log-transformed GDP per capita (unit: USD) and N saturation ratio of forests (%) in different countries. Each point represents a country. Solid lines show the fitted linear models, and shadings represent the standard errors of the fitted models.

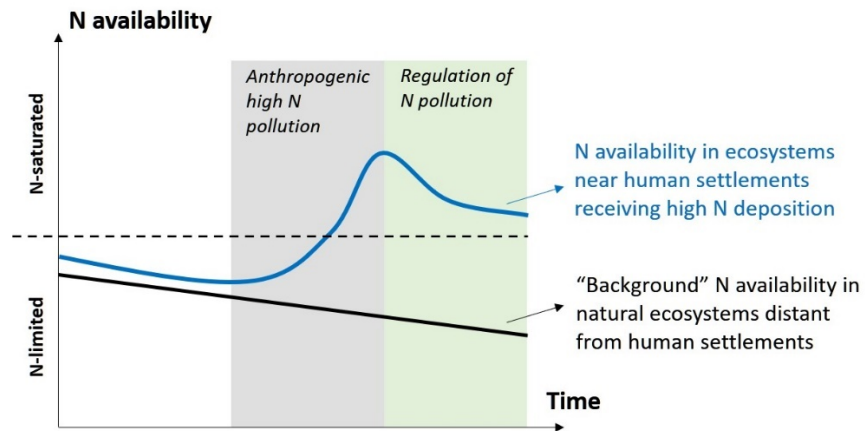

**Fig. S7.** A framework for explaining the observed declining N availability in natural ecosystems (due to increased CO<sub>2</sub> level and extended growing season) and also high N saturation ratios in forests near human settlements (which are receiving high N deposition).

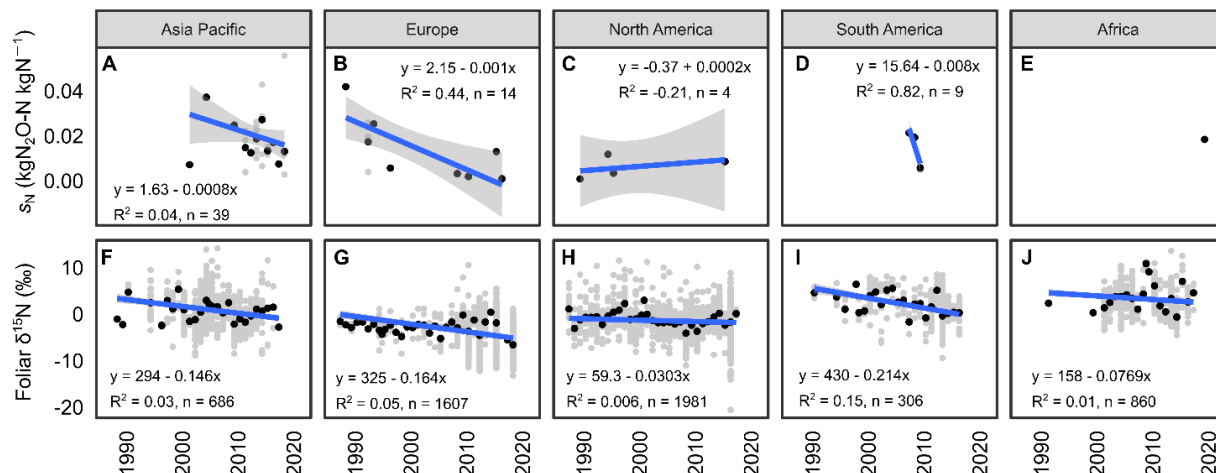

**Fig. S8.** Temporal change of N availability in different geographic regions, indicated by sensitivity of soil N<sub>2</sub>O emission to N deposition ( $s_N$ ) and foliar N isotope ratio ( $\delta^{15}\text{N}$ ). Panels (A-E) Temporal change of  $s_N$ .  $s_N$  was calculated using global N addition experiment data (Data S1). Each gray point represents a grid-year where N addition experiment data were available and  $s_N$  could be calculated. Black points are the annual mean values of  $s_N$ . Panels (F-J) Temporal change of foliar  $\delta^{15}\text{N}$ . Foliar  $\delta^{15}\text{N}$  data were from a published global dataset by Craine et al.<sup>13</sup> (<https://doi.org/10.5061/dryad.v2k2607>). Only data after 1985 were used, so as to match the time frame of  $s_N$  data. Blue lines were fitted linear models, and gray shadings represent the standard errors.

The two datasets used different geographic region classifications, so we reclassified data from several regions to facilitate comparison of the two metrics. In  $s_N$  dataset: data from “East Asia” and “Southeast Asia and Pacific” were reclassified to “Asia Pacific” region; data from “Western Europe” were reclassified to “Europe” region; data from “Sub-Saharan Africa” were reclassified to “Africa” region; data from “Latin America and Caribbean” were reclassified to “South America” region; no data were available for other regions. In foliar  $\delta^{15}\text{N}$  dataset: data from “Asia” and “Australia” were reclassified to “Asia Pacific” region. Data and code used for producing this figure (and all other figures) could be found in supplementary materials.

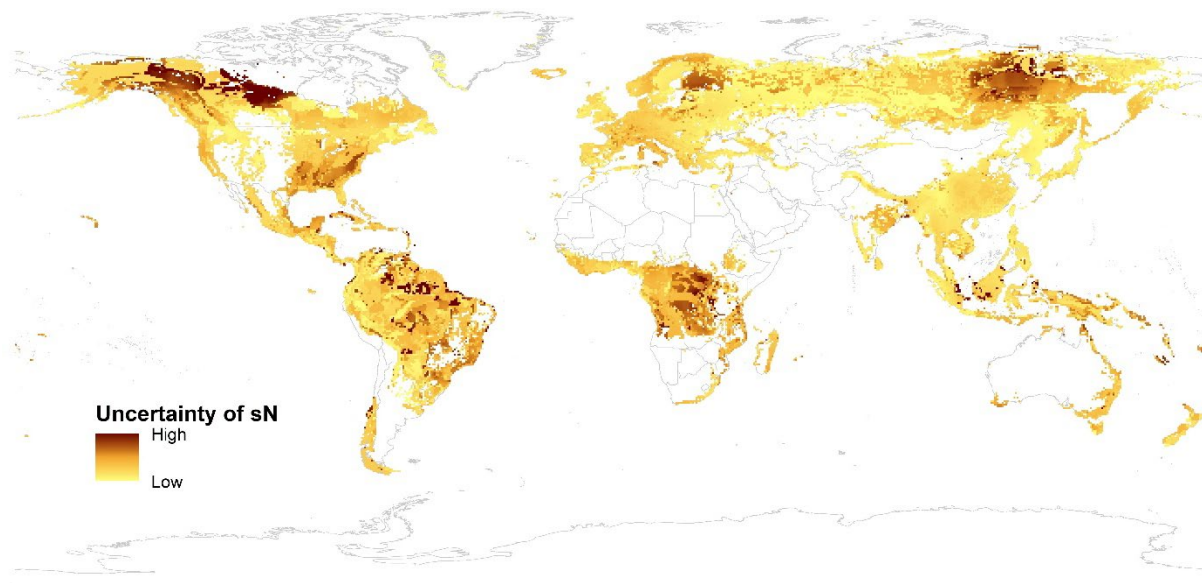

**Fig. S9.** Uncertainty of modeled sensitivity of soil N<sub>2</sub>O emission to N deposition ( $s_N$ ).

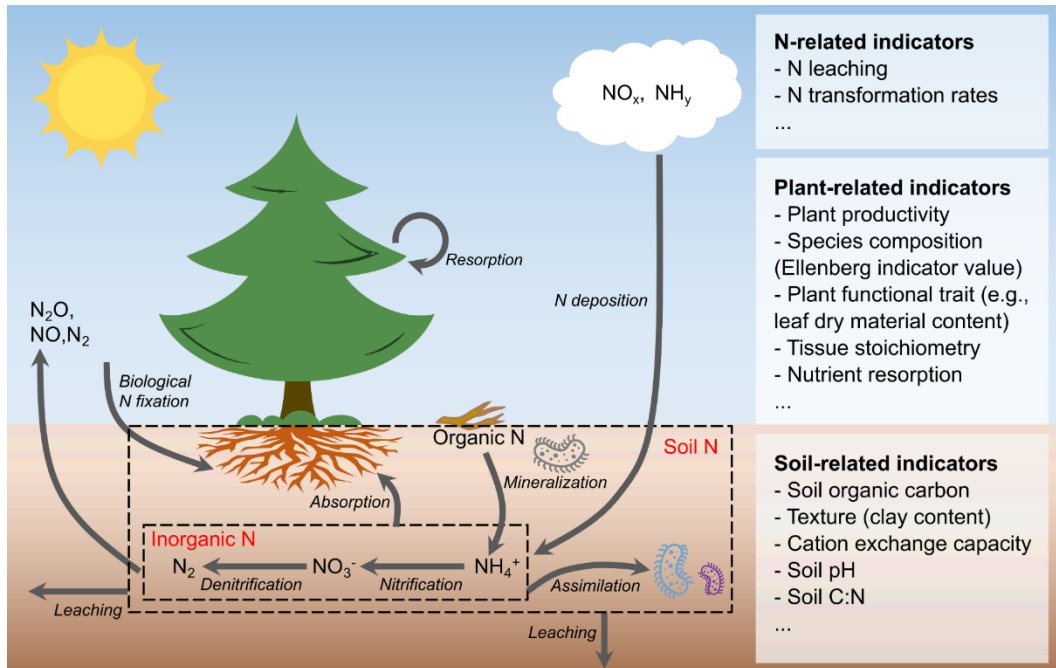

**Fig. S10.** Simplified illustration of the nitrogen (N) flows in forest ecosystems, and indicators of N saturation status.  $\text{NH}_x$ : reduced nitrogen;  $\text{NO}_y$ : oxidized nitrogen.

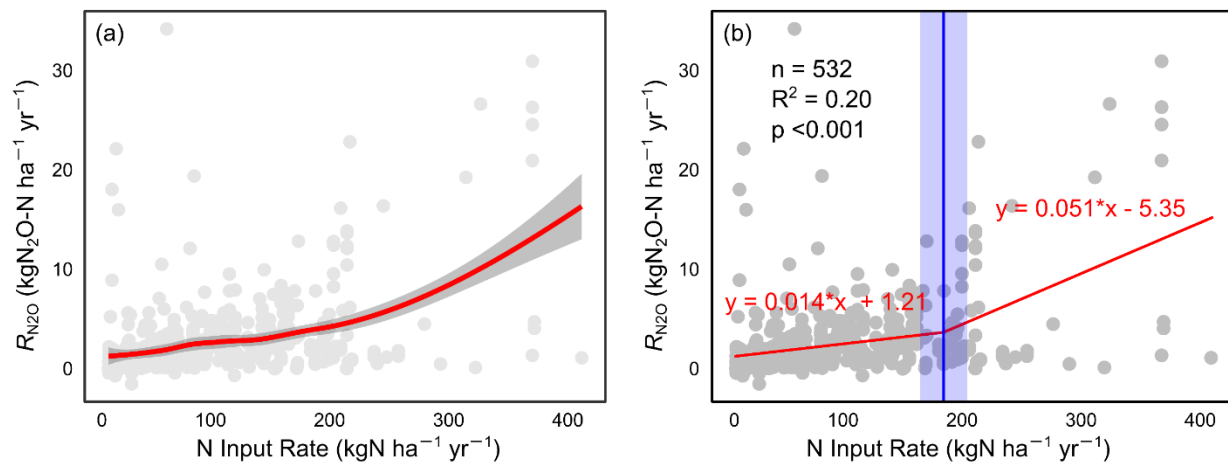

**Fig. S11.** Locally weighed regression model (a) and segmented linear regression model (b) on soil  $\text{N}_2\text{O}$  emission rate ( $R_{\text{N}_2\text{O}}$ ) and N input rate. The blue vertical line shows the estimated change point ( $174.70 \text{ kgN ha}^{-1} \text{ yr}^{-1}$ ). The blue shading represents the standard error of the estimated change point. The red lines and fonts represent the fitted models (model:  $R_{\text{N}_2\text{O}} \sim \text{N input rate}$ ).

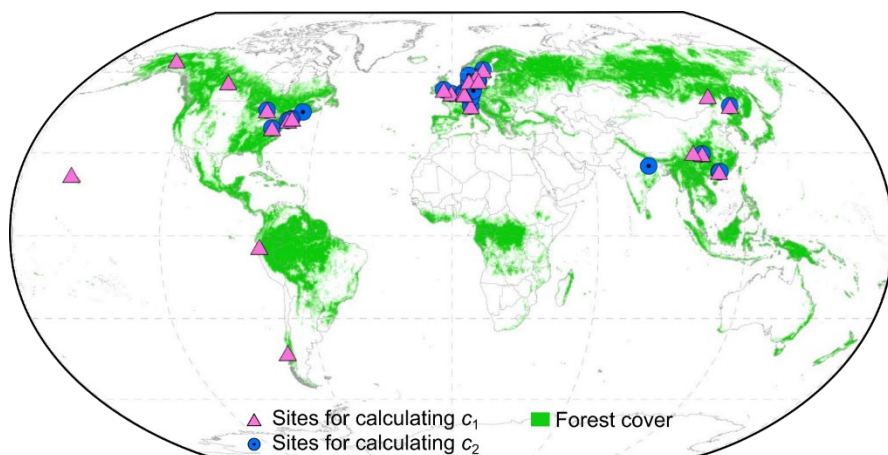

**Fig. S12.** The spatial map of N addition experiment sites for calculating  $c_1$  and  $c_2$ .  $c_1$ : sensitivity of total N loss to N deposition ( $\text{kgN kgN}^{-1}$ );  $c_2$ : sensitivity of N leaching to N deposition ( $\text{kgN kgN}^{-1}$ ).

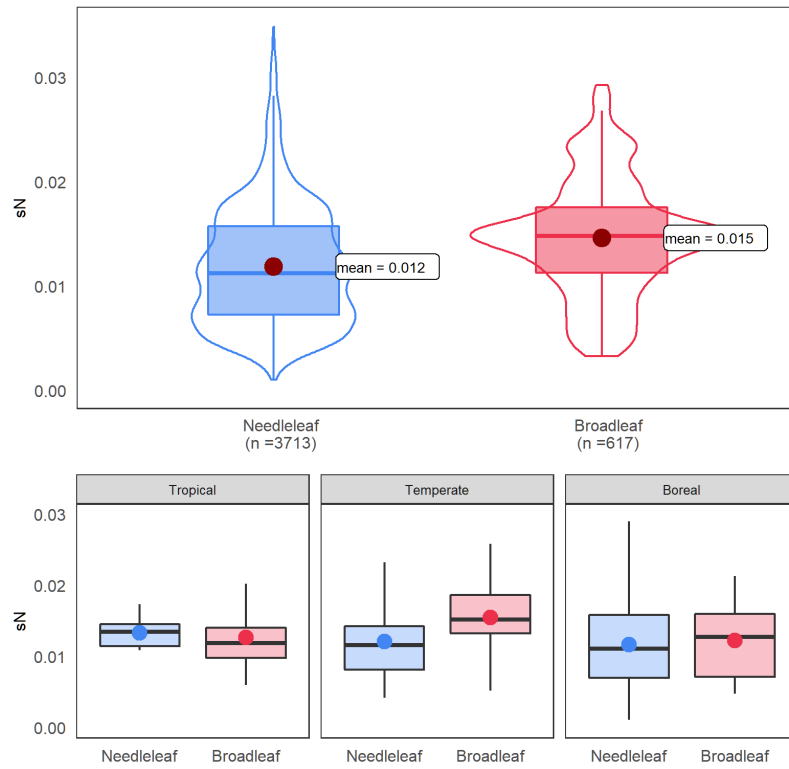

**Fig. S13.** Comparing the sensitivity of soil N<sub>2</sub>O emission to N deposition ( $s_N$ ) of broadleaf and needleleaf forests. Of the 4330 spatial grids where more than 50% of the area were covered by deciduous broadleaf or needleleaf forests, 3713 were needleleaf forest grids, and 617 were deciduous broadleaf forest grids.

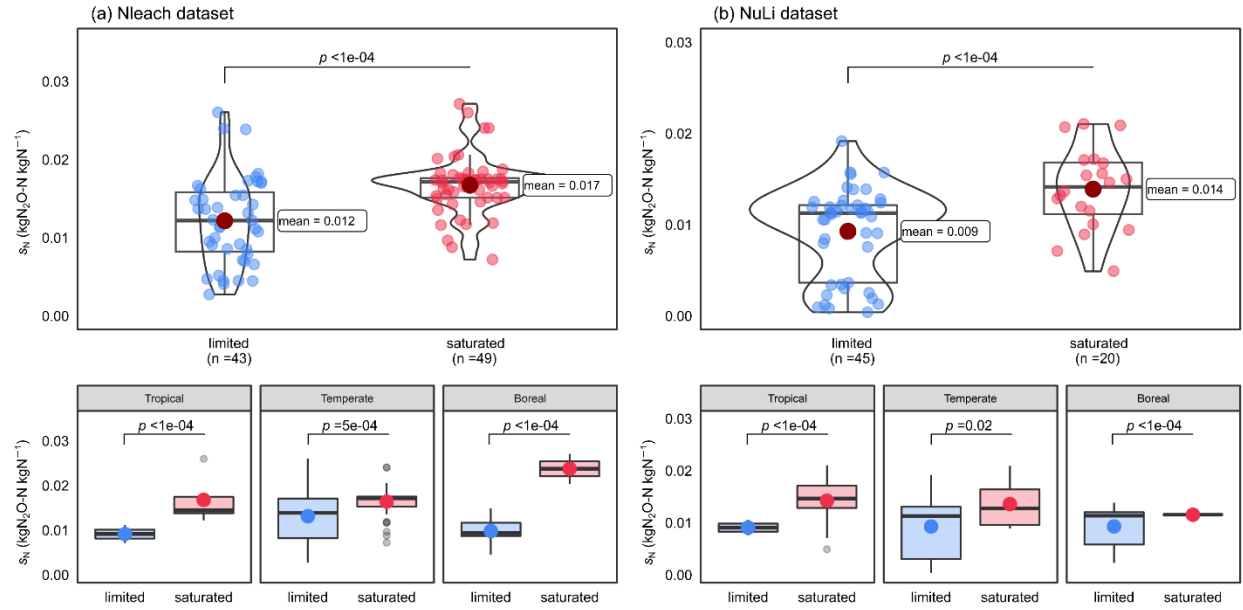

**Fig. S14.** Comparing the sensitivity of soil  $\text{N}_2\text{O}$  emission to N deposition ( $s_N$ ) of N-saturated and N-limited forests in Nleach dataset (Data S4) and NuLi dataset (Data S5). The N limitation or saturation status of forests were determined by researchers in field observations, which we compiled from published literature.

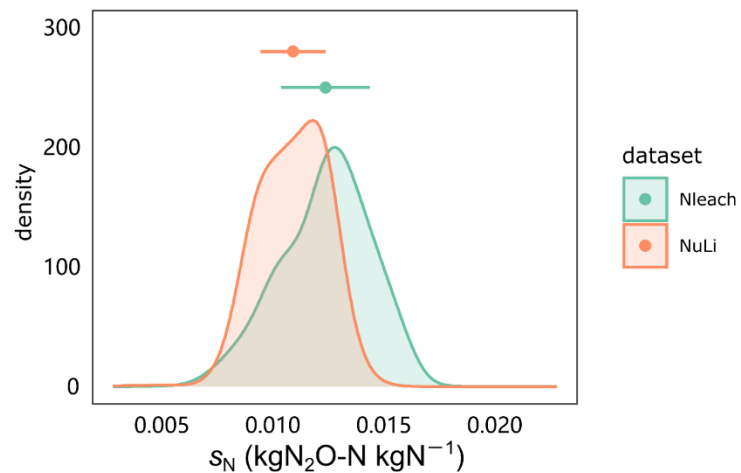

**Fig. S15.** Statistical distribution of the optimal cutoff values of  $s_N$  determined from field-observed N saturation status using Nleach and NuLi datasets (Data S4 and Data S5), separately. The curves represent the density of distribution of the cutoff values. The points and error bars above the curves of the corresponding color are the mean values and standard deviation of the optimal cutoff values.

## Supplementary Tables

**Table S1.** Linear models on soil N<sub>2</sub>O emission rate ( $R_{N_2O}$ ) and N input rate (model:  $R_{N_2O} \sim N$  input rate) built with low N input data (N addition rate  $\leq 150$  kgN ha<sup>-1</sup> yr<sup>-1</sup>) from global forest experiment sites, and the derived sensitivity ( $s_N$ ) of soil N<sub>2</sub>O emission to N deposition and background N<sub>2</sub>O emission rate ( $R_0$ ).

| No. | Longitude range | Latitude range | Biome     | $s_N$   | $R_0$    | n  | adj.R <sup>2</sup> | p value | References |
|-----|-----------------|----------------|-----------|---------|----------|----|--------------------|---------|------------|
| 1   | (19,19.5)       | (64,64.5)      | Boreal    | 0.002   | 0.045    | 2  | NA                 | NA      | 32         |
| 2   | (30.5,31)       | (62.5,63)      | Boreal    | 0.025   | 5.132    | 4  | 0.14               | 0.347   | 33         |
| 3   | (22.5,23)       | (62,62.5)      | Boreal    | 0.013   | 0.538    | 2  | NA                 | NA      | 34         |
| 4   | (8,8.5)         | (58.5,59)      | Boreal    | 0.026   | 0.343    | 6  | 0.57               | 0.052   | 35,36      |
| 5   | (-3.5,-3)       | (55.5,56)      | Temperate | 0.02    | 0.258    | 6  | 0.18               | 0.224   | 37         |
| 6   | (-3,-2.5)       | (55.5,56)      | Temperate | 0.006*  | -0.009   | 6  | 0.73               | 0.019   | 37,38      |
| 7   | (1.5,2)         | (52.5,53)      | Temperate | 0.004   | 0.233    | 2  | NA                 | NA      | 37         |
| 8   | (9.5,10)        | (51.5,52)      | Temperate | 0.042*  | 0.51     | 10 | 0.48               | 0.015   | 39-41      |
| 9   | (128.5,129)     | (47,47.5)      | Boreal    | 0.015   | 0.777    | 11 | 0.02               | 0.300   | 42-44      |
| 10  | (8.5,9)         | (47,47.5)      | Temperate | 0.003   | -0.062   | 4  | 0.63               | 0.134   | 45         |
| 11  | (-80.5,-80)     | (43.5,44)      | Temperate | 0.009   | 1.374*   | 4  | 0.79               | 0.073   | 46         |
| 12  | (-72.5,-72)     | (43,43.5)      | Temperate | 0.012   | -0.216   | 2  | NA                 | NA      | 47         |
| 13  | (141,141.5)     | (43,43.5)      | Temperate | 0.025   | 1.647    | 2  | NA                 | NA      | 48         |
| 14  | (-72.5,-72)     | (42.5,43)      | Temperate | 0.001   | 0.074    | 6  | 0.05               | 0.323   | 49         |
| 15  | (128,128.5)     | (42,42.5)      | Temperate | 0.01    | 0.67     | 2  | NA                 | NA      | 50         |
| 16  | (127.5,128)     | (41.5,42)      | Temperate | 0.029   | 2.287    | 13 | 0.11               | 0.141   | 51-53      |
| 17  | (-80.5,-80)     | (41.5,42)      | Temperate | 0.003   | 0.217    | 2  | NA                 | NA      | 54         |
| 18  | (-4,-3.5)       | (40,40.5)      | Temperate | 0.001*  | 0.026*   | 4  | 0.95               | 0.017   | 55         |
| 19  | (112,112.5)     | (36.5,37)      | Temperate | 0.056   | 2.754    | 3  | 0.98               | 0.068   | 56         |
| 20  | (111,111.5)     | (31.5,32)      | Temperate | 0.013** | 0.483    | 27 | 0.28               | 0.003   | 57-60      |
| 21  | (110,110.5)     | (31.5,32)      | Temperate | 0.023   | -0.31    | 4  | 0.54               | 0.166   | 61         |
| 22  | (120.5,121)     | (30.5,31)      | Temperate | 0.017   | 1.135    | 4  | 0.51               | 0.181   | 62         |
| 23  | (119.5,120)     | (30,30.5)      | Temperate | 0.003   | 1.238*** | 16 | 0.01               | 0.308   | 63-67      |
| 24  | (120,120.5)     | (30,30.5)      | Temperate | 0.012** | 0.834*   | 12 | 0.64               | 0.001   | 68,69      |
| 25  | (106.5,107)     | (29.5,30)      | Temperate | 0.025*  | 0.875*   | 3  | 1                  | 0.018   | 70         |
| 26  | (115.5,116)     | (29.5,30)      | Temperate | 0.012   | 2.025    | 6  | 0.14               | 0.248   | 71         |

|    |             |           |           |          |          |    |      |        |         |
|----|-------------|-----------|-----------|----------|----------|----|------|--------|---------|
| 27 | (116.5,117) | (28,28.5) | Temperate | 0.013    | 0.16     | 2  | NA   | NA     | 72      |
| 28 | (118,118.5) | (27,27.5) | Tropical  | 0.015    | 1.948    | 9  | 0.12 | 0.190  | 73      |
| 29 | (115,115.5) | (26.5,27) | Tropical  | 0.026*** | -0.092   | 54 | 0.47 | <0.001 | 74-83   |
| 30 | (117,117.5) | (26,26.5) | Tropical  | 0.007    | 0.5      | 3  | 0.55 | 0.313  | 84      |
| 31 | (118,118.5) | (25.5,26) | Tropical  | 0.012    | 0.601    | 4  | 0.33 | 0.257  | 85      |
| 32 | (113,113.5) | (23.5,24) | Tropical  | 0.014    | -0.226   | 3  | 0.77 | 0.220  | 86      |
| 33 | (112.5,113) | (23,23.5) | Tropical  | 0.027*   | 0.19     | 22 | 0.15 | 0.041  | 87-89   |
| 34 | (112.5,113) | (22.5,23) | Tropical  | 0.004    | 1.919*** | 14 | 0.11 | 0.129  | 90      |
| 35 | (106.5,107) | (22,22.5) | Tropical  | 0.012*** | -0.038   | 8  | 0.84 | 0.001  | 91      |
| 36 | (107,107.5) | (22,22.5) | Tropical  | 0.043*   | -0.089   | 10 | 0.51 | 0.013  | 92-95   |
| 37 | (107.5,108) | (22,22.5) | Tropical  | 0.007**  | 0.589**  | 4  | 0.98 | 0.007  | 96      |
| 38 | (101,101.5) | (21.5,22) | Tropical  | 0.037    | 2.101*   | 9  | 0.18 | 0.144  | 97,98   |
| 39 | (110.5,111) | (21,21.5) | Tropical  | 0.018    | 3.195    | 3  | 0.69 | 0.256  | 99      |
| 40 | (-80,-79.5) | (9,9.5)   | Tropical  | 0.021**  | 0.674    | 8  | 0.71 | 0.005  | 100,101 |
| 41 | (-82.5,-82) | (8.5,9)   | Tropical  | 0.019    | 1.063    | 8  | 0.32 | 0.083  | 100,101 |
| 42 | (116.5,117) | (6,6.5)   | Tropical  | 0.007**  | 0.517**  | 10 | 0.61 | 0.005  | 102     |
| 43 | (31.5,32)   | (1.5,2)   | Tropical  | 0.018*** | 1.756*** | 4  | 1    | 0.001  | 103     |
| 44 | (102,102.5) | (-1.5,-1) | Tropical  | 0.022**  | 0.919*   | 7  | 0.84 | 0.002  | 104     |
| 45 | (-79.5,-79) | (-4,-3.5) | Tropical  | 0.005    | 0.135    | 3  | 0.44 | 0.356  | 105     |
| 46 | (-79,-78.5) | (-4.5,-4) | Tropical  | 0.006    | 0.471    | 3  | 0.5  | 0.333  | 105     |
| 47 | (-79.5,-79) | (-4.5,-4) | Tropical  | 0.006    | -0.11    | 3  | 0.95 | 0.106  | 105     |

\*  $p < 0.05$ ; \*\*  $p < 0.01$ ; \*\*\*  $p < 0.001$ ; NA, not applicable

**Table S2.** Generalized linear models on environmental factors and the sensitivity ( $s_N$ ) of soil N<sub>2</sub>O emission to N deposition and the background N<sub>2</sub>O emission rate ( $R_0$ ). Models were refined from full models using environmental factors (MAT, MAP,  $N_{\text{depo}}$ , MAT.cv, MAP.cv,  $N_{\text{depo}}$ .cv, Clay, Sand) and their interactions as predictors<sup>†</sup>.

|                                                                                                             | Estimate  | SE       | t      | p        |
|-------------------------------------------------------------------------------------------------------------|-----------|----------|--------|----------|
| <b>Refined model on <math>s_N^{\ddagger}</math></b> (family = “gaussian”, deviance explained = 91.1%, n=46) |           |          |        |          |
| Clay                                                                                                        | 4.77E-03  | 1.83E-03 | 2.605  | 0.013*   |
| Sand                                                                                                        | 3.15E-03  | 9.20E-04 | 3.419  | 0.001**  |
| $\log(N_{\text{depo}})$                                                                                     | 2.01E-02  | 1.14E-02 | 1.769  | 0.085    |
| Clay $\times$ $\log(N_{\text{depo}}$ .cv)                                                                   | 2.13E-03  | 9.35E-04 | 2.282  | 0.028*   |
| Sand $\times$ $\log(N_{\text{depo}}$ .cv)                                                                   | 1.17E-03  | 3.82E-04 | 3.056  | 0.004**  |
| Clay $\times$ Sand                                                                                          | -1.90E-04 | 6.94E-05 | -2.735 | 0.009**  |
| Clay $\times$ Sand $\times$ $\log(N_{\text{depo}}$ .cv)                                                     | -1.14E-04 | 3.66E-05 | -3.112 | 0.003**  |
| <b>Refined model on <math>R_0^{\S}</math></b> (family = “quasipoisson”, deviance explained = 43.2%, n = 45) |           |          |        |          |
| $\log(N_{\text{depo}}$ .cv)                                                                                 | 1.99E-01  | 9.56E-02 | 2.084  | 0.043*   |
| MAT $\times$ Sand $\times$ Clay                                                                             | 3.04E-06  | 5.99E-07 | 5.072  | 0.000*** |
| MAP $\times$ MAP.cv $\times$ $\log(N_{\text{depo}})$                                                        | -8.31E-04 | 2.91E-04 | -2.854 | 0.007**  |

<sup>†</sup> These variables were selected based on availability of global datasets (for extrapolation), and mechanistic relevance. Climate is an important state factor that shapes ecosystem properties; N deposition is an important driving force of ecosystem N dynamics; soil texture is indicative of soil structure and aeration status, which is critical for nitrification and denitrification processes. MAT: mean annual temperature; MAP: mean annual precipitation;  $N_{\text{depo}}$ : mean annual N deposition; Sand: soil sand content; Clay: soil clay content.

<sup>‡</sup>  $s_N \sim (\text{Clay} + \text{Sand} + \log(N_{\text{depo}}) + \text{Clay} \times \log(N_{\text{depo}}$ .cv) + Sand  $\times$   $\log(N_{\text{depo}}$ .cv) + Clay  $\times$  Sand + Clay  $\times$  Sand  $\times$   $\log(N_{\text{depo}}$ .cv))<sup>2</sup>

<sup>§</sup>  $R_0 \sim \text{EXP}(\log(N_{\text{depo}}$ .cv) + MAT  $\times$  Sand  $\times$  Clay + MAP  $\times$  MAP.cv  $\times$   $\log(N_{\text{depo}})$ ) - 0.5

\*  $p < 0.05$ ; \*\*  $p < 0.01$ ; \*\*\*  $p < 0.001$

**Table S3.** Change points of the relationship between N input rate and soil N<sub>2</sub>O emission rate used or estimated in previous research

| Change point estimated/used (kgN ha <sup>-1</sup> yr <sup>-1</sup> ) | Reference |
|----------------------------------------------------------------------|-----------|
| 101                                                                  | 19        |
| 135                                                                  | 20        |
| 140                                                                  | 21        |
| 100–150                                                              | 22        |
| 150–200                                                              | 23        |

**Table S4.** Comparing segmented regression models based on Bayes factor (BF)

| Models (M <sub>x</sub> ) | Number of<br>change points<br>estimated | BIC     | BF <sub>x0</sub> * | Pr(M <sub>0</sub> is<br>better) |
|--------------------------|-----------------------------------------|---------|--------------------|---------------------------------|
| M <sub>0</sub>           | 1                                       | 2915.87 | /                  | /                               |
| M <sub>1</sub>           | 2                                       | 2928.20 | 474.90             | > 0.99                          |
| M <sub>2</sub>           | 3                                       | 2925.06 | 98.94              | > 0.95                          |
| M <sub>3</sub>           | 4                                       | 2951.56 | 56122954           | > 0.99                          |

\*BF<sub>x0</sub> = exp((BIC(M<sub>x</sub>)-BIC(M<sub>0</sub>))/2)

**Table S5.** Comparing the biome-mean sensitivity ( $s_N$ ) of soil N<sub>2</sub>O emission to N deposition from calculation and the  $s_N$  estimated with generalized linear model.

| Biome     | $c_1$       | $c_2$       | $c_3^*$ | Calculated $s_N$ | Modeled $s_N$ |
|-----------|-------------|-------------|---------|------------------|---------------|
| Tropical  | 0.42 (0.04) | 0.29 (0.01) | 0.20    | 0.026 (0.011)    | 0.015 (0.005) |
| Temperate | 0.46 (0.05) | 0.36 (0.05) | 0.19    | 0.019 (0.018)    | 0.014 (0.004) |
| Boreal    | 0.41 (0.08) | 0.37 (0.08) | 0.19    | 0.008 (0.030)    | 0.010 (0.005) |
| All       | 0.44 (0.05) | 0.35 (0.05) | 0.19    | 0.017 (0.019)    | 0.013 (0.005) |

Values in the parentheses are the standard errors of the estimates.

\* Biome mean values of  $c_3$  were calculated from modeled nitrification and denitrification end-product ratios by Bai, et al. <sup>27</sup>.

**Data S1. (separate file)**

Compiled dataset on soil N<sub>2</sub>O emission rate from N addition experiments in global forests (N<sub>2</sub>O\_exp dataset in main text).

**Data S2. (separate file)**

Compiled data on soil N<sub>2</sub>O emission rate under natural conditions in global forests (N<sub>2</sub>O\_obs dataset in main text).

**Data S3. (separate file)**

Compiled dataset on total N loss rate, N leaching rate and change rate of soil N pool from N addition experiments in global forests (Ncycle\_exp dataset in main text).

**Data S4. (separate file)**

Compiled dataset on global forest N saturation status (limited or saturated) indicated by N leaching rate (Nleach dataset in main text).

**Data S5. (separate file)**

An existing dataset from Du, et al. <sup>12</sup> on global forest N saturation status (limited or saturated) indicated by plant growth response to N input (NuLi dataset in main text).

**Data S6. (separate file)**

GDP per capita data of global countries, downloaded from World Bank Open Data portal (<https://data.worldbank.org/>).

**Data S7. (separate file)**

Data on environmental factors (MAT, MAP, N deposition rate, etc.) in global forests, extracted from spatial datasets mentioned in Methods section.

**Code S1. (separate file)**

R code script used to carry out the data analysis processes, and produce the figures.

## References

- 1 Ingestad, T., Aronsson, A. & Ågren, G. I. Nutrient flux density model of mineral nutrition in conifer ecosystems. *Studia Forestalia Suecica* **160**, 61-71 (1981).
- 2 Ågren, G. I. & Bosatta, E. Nitrogen saturation of terrestrial ecosystems. *Environ Pollut* **54**, 185-197, doi:10.1016/0269-7491(88)90111-X (1988).
- 3 Grennfelt, P. & Hultberg, H. Effects of nitrogen deposition on the acidification of terrestrial and aquatic ecosystems. *Water, Air, and Soil Pollution* **30**, 945-963, doi:10.1007/BF00303359 (1986).
- 4 Currie, W. S. The responsive C and N biogeochemistry of the temperate forest floor. *Trends in Ecology & Evolution* **14**, 316-320, doi:10.1016/s0169-5347(99)01645-6 (1999).
- 5 Tomlinson, G. H. Acidic deposition, nutrient leaching and forest growth. *Biogeochemistry* **65**, 51-81, doi:10.1023/A:1026069927380 (2003).
- 6 Kopacek, J. *et al.* Nitrogen, organic carbon and sulphur cycling in terrestrial ecosystems: linking nitrogen saturation to carbon limitation of soil microbial processes. *Biogeochemistry* **115**, 33-51, doi:10.1007/s10533-013-9892-7 (2013).
- 7 Van Sundert, K., Horemans, J. A., Stendahl, J. & Vicca, S. The influence of soil properties and nutrients on conifer forest growth in Sweden, and the first steps in developing a nutrient availability metric. *Biogeosciences* **15**, 3475-3496, doi:10.5194/bg-15-3475-2018 (2018).
- 8 Dise, N. & Wright, R. Nitrogen leaching from European forests in relation to nitrogen deposition. *Forest Ecol Manag* **71**, 153-161, doi:10.1016/0378-1127(94)06092-W (1995).
- 9 Tietema, A. *et al.* Nitrate leaching in coniferous forest ecosystems: The European field-scale manipulation experiments NITREX (nitrogen saturation experiments) and EXMAN (experimental manipulation of forest ecosystems). *Global Biogeochem Cy* **11**, 617-626, doi:10.1029/97gb01628 (1997).
- 10 Braakhekke, M. C. *et al.* Nitrogen leaching from natural ecosystems under global change: a modelling study. *Earth System Dynamics* **8**, 1121-1139, doi:10.5194/esd-8-1121-2017 (2017).
- 11 Diekmann, M. Species indicator values as an important tool in applied plant ecology – a review. *Basic and Applied Ecology* **4**, 493-506, doi:<https://doi.org/10.1078/1439-1791-00185> (2003).
- 12 Du, E. *et al.* Global patterns of terrestrial nitrogen and phosphorus limitation. *Nat Geosci* **13**, 221-226, doi:10.1038/s41561-019-0530-4 (2020).
- 13 Craine, J. M. *et al.* Isotopic evidence for oligotrophication of terrestrial ecosystems. *Nature Ecology & Evolution* **2**, 1735-1744, doi:10.1038/s41559-018-0694-0 (2018).
- 14 Mason, R. E. *et al.* Evidence, causes, and consequences of declining nitrogen availability in terrestrial ecosystems. *Science* **376**, eabh3767, doi:10.1126/science.abh3767 (2022).
- 15 Craine, J. M. *et al.* Ecological interpretations of nitrogen isotope ratios of terrestrial plants and soils. *Plant Soil* **396**, 1-26, doi:10.1007/s11104-015-2542-1 (2015).
- 16 Hiltbrunner, E., Körner, C., Meier, R., Braun, S. & Kahmen, A. Data do not support large-scale oligotrophication of terrestrial ecosystems. *Nature Ecology & Evolution* **3**, 1285-1286, doi:10.1038/s41559-019-0948-5 (2019).
- 17 Olff, H. *et al.* Explanations for nitrogen decline. *Science* **376**, 1169-1170, doi:10.1126/science.abq7575 (2022).
- 18 Kim, D.-G., Hernandez-Ramirez, G. & Giltrap, D. Linear and nonlinear dependency of direct nitrous oxide emissions on fertilizer nitrogen input: A meta-analysis. *Agriculture, Ecosystems & Environment* **168**, 53-65, doi:10.1016/j.agee.2012.02.021 (2013).

411 19 McSwiney, C. P. & Robertson, G. P. Nonlinear response of N<sub>2</sub>O flux to incremental  
412 fertilizer addition in a continuous maize (*Zea mays* L.) cropping system. *Global Change*  
413 *Biol* **11**, 1712-1719, doi:10.1111/j.1365-2486.2005.01040.x (2005).

414 20 Hoben, J., Gehl, R., Millar, N., Grace, P. & Robertson, G. Nonlinear nitrous oxide (N<sub>2</sub>O)  
415 response to nitrogen fertilizer in on - farm corn crops of the US Midwest. *Global Change*  
416 *Biol* **17**, 1140-1152, doi:10.1111/j.1365-2486.2010.02349.x (2011).

417 21 Lu, M. *et al.* Contrasting response of soil N<sub>2</sub>O release to ammonium, nitrate, and urea  
418 addition rates is determined by substrate availability and microbial community abundance  
419 and composition. *Eur J Soil Biol* **109**, 103393, doi:10.1016/j.ejsobi.2022.103393 (2022).

420 22 Bouwman, A. F., Boumans, L. J. M. & Batjes, N. H. Emissions of N<sub>2</sub>O and NO from  
421 fertilized fields: Summary of available measurement data. *Global Biogeochem Cy* **16**, 6-  
422 1-6-13, doi:10.1029/2001GB001811 (2002).

423 23 Shcherbak, I., Millar, N. & Robertson, G. P. Global metaanalysis of the nonlinear  
424 response of soil nitrous oxide (N<sub>2</sub>O) emissions to fertilizer nitrogen. *Proceedings of the*  
425 *National Academy of Sciences* **111**, 9199-9204, doi:10.1073/pnas.1322434111 (2014).

426 24 R: A language and environment for statistical computing (R Foundation for Statistical  
427 Computing, Vienna, Austria, 2020).

428 25 Muggeo, V. M. Segmented: an R package to fit regression models with broken-line  
429 relationships. *R news* **8**, 20-25 (2008).

430 26 Wagenmakers, E.-J. A practical solution to the pervasive problems of p values.  
431 *Psychonomic Bulletin & Review* **14**, 779-804, doi:10.3758/BF03194105 (2007).

432 27 Bai, E., Houlton, B. Z. & Wang, Y. P. Isotopic identification of nitrogen hotspots across  
433 natural terrestrial ecosystems. *Biogeosciences* **9**, 3287-3304, doi:10.5194/bg-9-3287-2012  
434 (2012).

435 28 Butterbach-Bahl, K., Gasche, R., Breuer, L. & Papen, H. Fluxes of NO and N<sub>2</sub>O from  
436 temperate forest soils: impact of forest type, N deposition and of liming on the NO and  
437 N<sub>2</sub>O emissions. *Nutr Cycl Agroecosys* **48**, 79-90, doi:10.1023/a:1009785521107 (1997).

438 29 Tuanmu, M.-N. & Jetz, W. A global 1-km consensus land-cover product for biodiversity  
439 and ecosystem modelling. *Global Ecol Biogeogr* **23**, 1031-1045,  
440 doi:<https://doi.org/10.1111/geb.12182> (2014).

441 30 Aber, J. D. *et al.* Nitrogen saturation in temperate forest ecosystems: hypotheses  
442 revisited. *BioScience* **48**, 921-934, doi:10.2307/1313296 (1998).

443 31 Ackerman, D., Millet, D. B. & Chen, X. Global estimates of inorganic nitrogen  
444 deposition across four decades. *Global Biogeochem Cy* **33**, 100-107,  
445 doi:10.1029/2018GB005990 (2019).

446 32 Rutting, T., Bjorsne, A. K., Weslien, P., Kasimir, A. & Klemetsson, L. Low Nitrous  
447 Oxide Emissions in a Boreal Spruce Forest Soil, Despite Long-Term Fertilization.  
448 *Frontiers in Forests and Global Change* **4**, 7, doi:10.3389/ffgc.2021.710574 (2021).

449 33 Regina, K., Nykanen, H., Maljanen, M., Silvola, J. & Martikainen, P. J. Emissions of  
450 N<sub>2</sub>O and NO and net nitrogen mineralization in a boreal forested peatland treated with  
451 different nitrogen compounds. *Canadian Journal of Forest Research-Revue Canadienne*  
452 *De Recherche Forestiere* **28**, 132-140, doi:10.1139/cjfr-28-1-132 (1998).

453 34 Ojanen, P. *et al.* Long-term effect of fertilization on the greenhouse gas exchange of low-  
454 productive peatland forests. *Forest Ecol Manag* **432**, 786-798,  
455 doi:10.1016/j.foreco.2018.10.015 (2019).

456 35 Sitaula, B. K., Bakken, L. R. & Abrahamsen, G. N-FERTILIZATION AND SOIL  
457 ACIDIFICATION EFFECTS ON N<sub>2</sub>O AND CO<sub>2</sub> EMISSION FROM TEMPERATE  
458 PINE FOREST SOIL. *Soil Biol Biochem* **27**, 1401-1408, doi:10.1016/0038-  
459 0717(95)00078-s (1995).

- 460 36 Sitaula, B. K., Bakken, L. R. & Abrahamsen, G. Nutrient balance in Scots pine (*Pinus*  
461 *sylvestris* L) forest .3. Fluxes of N<sub>2</sub>O from lysimeter as influenced by nitrogen input.  
462 *Water Air Soil Poll* **85**, 1155-1159, doi:10.1007/bf00477137 (1995).
- 463 37 Skiba, U. M., Sheppard, L. J., MacDonald, J. & Fowler, D. Some key environmental  
464 variables controlling nitrous oxide emissions from agricultural and semi-natural soils in  
465 Scotland. *Atmos Environ* **32**, 3311-3320, doi:10.1016/s1352-2310(97)00364-6 (1998).
- 466 38 Skiba, U., Sheppard, L. J., Pitcairn, C. E. R., Van Dijk, S. & Rossall, M. J. The effect of  
467 N deposition on nitrous oxide and nitric oxide emissions from temperate forest soils.  
468 *Water Air Soil Poll* **116**, 89-98, doi:10.1023/a:1005246625038 (1999).
- 469 39 Brumme, R. & Beese, F. Effects of liming and nitrogen fertilization on emissions of CO<sub>2</sub>  
470 and N<sub>2</sub>O from a temperate forest. *Journal of Geophysical Research: Atmospheres* **97**,  
471 12851-12858, doi:10.1029/92JD01217 (1992).
- 472 40 Borken, W., Beese, F., Brumme, R. & Lamersdorf, N. Long-term reduction in nitrogen  
473 and proton inputs did not affect atmospheric methane uptake and nitrous oxide emission  
474 from a German spruce forest soil. *Soil Biol Biochem* **34**, 1815-1819, doi:10.1016/s0038-  
475 0717(02)00171-2 (2002).
- 476 41 Corre, M. D., Beese, F. O. & Brumme, R. Soil nitrogen cycle in high nitrogen deposition  
477 forest: changes under nitrogen saturation and liming. *Ecol Appl* **13**, 287-298,  
478 doi:10.1890/1051-0761(2003)013[0287:SNCIHN]2.0.CO;2 (2003).
- 479 42 He, S. *Influence of simulated nitrogen deposition on greenhouse gas from mixed*  
480 *broadleaf and red pine forest*, Mudanjiang Normal University, (2015).
- 481 43 Tian, P., Zhang, J. B., Cai, Z. C. & Jin, G. Z. Different response of CO<sub>2</sub> and N<sub>2</sub>O fluxes  
482 to N deposition with seasons in a temperate forest in northeastern China. *J Soil Sediment*  
483 **18**, 1821-1831, doi:10.1007/s11368-018-1919-1 (2018).
- 484 44 Song, L., Tian, P., Zhang, J. B. & Jin, G. Z. Effects of three years of simulated nitrogen  
485 deposition on soil nitrogen dynamics and greenhouse gas emissions in a Korean pine  
486 plantation of northeast China. *Sci Total Environ* **609**, 1303-1311,  
487 doi:10.1016/j.scitotenv.2017.08.017 (2017).
- 488 45 Krause, K., Niklaus, P. A. & Schleppi, P. Soil-atmosphere fluxes of the greenhouse gases  
489 CO<sub>2</sub>, CH<sub>4</sub> and N<sub>2</sub>O in a mountain spruce forest subjected to long-term N addition and to  
490 tree girdling. *Agr Forest Meteorol* **181**, 61-68, doi:10.1016/j.agrformet.2013.07.007  
491 (2013).
- 492 46 Lutes, K., Oelbermann, M., Thevathasan, N. V. & Gordon, A. M. Effect of nitrogen  
493 fertilizer on greenhouse gas emissions in two willow clones (*Salix miyabeana* and *S-*  
494 *dasyclados*) in southern Ontario, Canada. *Agroforest Syst* **90**, 785-796,  
495 doi:10.1007/s10457-016-9897-z (2016).
- 496 47 Castro, M. S., Steudler, P. A., Melillo, J. M., Aber, J. D. & Millham, S. EXCHANGE OF  
497 N<sub>2</sub>O AND CH<sub>4</sub> BETWEEN THE ATMOSPHERE AND SOILS IN SPRUCE-FIR  
498 FORESTS IN THE NORTHEASTERN UNITED-STATES. *Biogeochemistry* **18**, 119-  
499 135, doi:10.1007/bf00003273 (1992).
- 500 48 Kim, Y. S. *et al.* Simulated nitrogen inputs influence methane and nitrous oxide fluxes  
501 from a young larch plantation in northern Japan. *Atmos Environ* **46**, 36-44,  
502 doi:10.1016/j.atmosenv.2011.10.034 (2012).
- 503 49 Bowden, R. D., Melillo, J. M., Steudler, P. A. & Aber, J. D. Effects of nitrogen additions  
504 on annual nitrous oxide fluxes from temperate forest soils in the northeastern United  
505 States. *Journal of Geophysical Research: Atmospheres* **96**, 9321-9328,  
506 doi:10.1029/91JD00151 (1991).
- 507 50 Geng, S. C., Chen, Z. J., Han, S. J., Wang, F. & Zhang, J. H. Rainfall reduction amplifies  
508 the stimulatory effect of nitrogen addition on N<sub>2</sub>O emissions from a temperate forest soil.  
509 *Sci Rep-Uk* **7**, 1-10, doi:10.1038/srep43329 (2017).

510 51 Cheng, S. L. *et al.* Nonlinear responses of soil nitrous oxide emission to multi-level  
511 nitrogen enrichment in a temperate needle-broadleaved mixed forest in Northeast China.  
512 *Catena* **147**, 556-563, doi:10.1016/j.catena.2016.08.010 (2016).

513 52 Bai, E. *et al.* Pulse Increase of Soil N<sub>2</sub>O Emission in Response to N Addition in a  
514 Temperate Forest on Mt Changbai, Northeast China. *Plos One* **9**,  
515 doi:10.1371/journal.pone.0102765 (2014).

516 53 Peng, B., Sun, J. F., Liu, J., Xia, Z. W. & Dai, W. W. Relative contributions of different  
517 substrates to soil N<sub>2</sub>O emission and their responses to N addition in a temperate forest.  
518 *Sci Total Environ* **767**, 8, doi:10.1016/j.scitotenv.2020.144126 (2021).

519 54 Bowden, R. D., Rullo, G., Stevens, G. R. & Steudler, P. A. Soil Fluxes of Carbon  
520 Dioxide, Nitrous Oxide, and Methane at a Productive Temperate Deciduous Forest. *J*  
521 *Environ Qual* **29**, 268-276, doi:10.2134/jeq2000.00472425002900010034x (2000).

522 55 Lafuente, A. *et al.* Simulated nitrogen deposition influences soil greenhouse gas fluxes in  
523 a Mediterranean dryland. *Sci Total Environ* **737**, 8, doi:10.1016/j.scitotenv.2020.139610  
524 (2020).

525 56 Yu, H. *Effects of soil acidity/alkalinity on soil nitrogen and greenhouse gas fluxes in a*  
526 *Pinus tabulaeformis forest in Taiyue* Master's thesis, Beijing Forestry University, (2019).

527 57 Lin, Z. *Effects of simulated nitrogen deposition on the carbon sinks in the temperate*  
528 *forest soil*, Beijing Forestry University, (2013).

529 58 Lin, Z., Wang, C. & Wang, R. Effects of simulated N deposition on N<sub>2</sub>O emission from  
530 temperate forest soil subject to freezing-thawing process. *Ecology and Environmental*  
531 *Sciences* **21**, 1804-1809, doi:10.16258/j.cnki.1674-5906(2012)11-1804-06 (2012).

532 59 Wang, R. *Effects of simulated atmospheric nitrogen deposition on the exchange fluxes of*  
533 *greenhouse gases in the temperate forest soil*, Beijing Forestry University, (2012).

534 60 Xu, K., Wang, C. M. & Yang, X. T. Five-year study of the effects of simulated nitrogen  
535 deposition levels and forms on soil nitrous oxide emissions from a temperate forest in  
536 northern China. *Plos One* **12**, doi:10.1371/journal.pone.0189831 (2017).

537 61 Pan, D. *Study on greenhouse gas emission for grassland soil below different forest soils*  
538 *under precipitation reduction and nitrogen deposition in Shennongjia Mountain*, Gansu  
539 Agricultural University, (2013).

540 62 Tu, J. & Zhang, C. The effect of different fertilizer use on soil greenhouse gases in a  
541 *Prunus persica* stand. *Modern Horticulture*, 7-9 (2018).

542 63 Lin, Z. *Effects of biochar-based fertilizer and chemical fertilizer on soil N<sub>2</sub>O emission in*  
543 *moso bamboo (Phyllostachys edulis) forests*, Zhejiang A&F University, (2019).

544 64 Chen, X. *Effects of fertilization and understory vegetation management on soil*  
545 *greenhouse gas emissions in Chinese pecan stands*, Zhejiang A&F University, (2014).

546 65 Chen, X. *et al.* Effects of fertilization on soil N<sub>2</sub>O flux in Chinese *Carya cathayensis*  
547 stands. *Journal of Plant Nutrition and Fertilizer* **20**, 1262-1270 (2014).

548 66 Wang, Z. *Effects of bamboo leaf and its biochar additions on soil greenhouse gas*  
549 *emissions in Chinese chestnut stands* Master's thesis, Zhejiang A&F University, (2014).

550 67 Song, X. Z. *et al.* Nitrogen addition increased CO<sub>2</sub> uptake more than non-CO<sub>2</sub>  
551 greenhouse gases emissions in a Moso bamboo forest. *Sci Adv* **6**,  
552 doi:10.1126/sciadv.aaw5790 (2020).

553 68 Zhang, J., Li, Y., Jiang, P., Zhou, G. & Liu, J. Effects of fertilization on labile carbon  
554 pools and emissions of greenhouse gas in soils of Chinese chestnut stands. *Journal of*  
555 *Plant Nutrition and Fertilizer* **19**, 745-752 (2013).

556 69 Zhang, J. *Effects of fertilization and understory vegetation management on soil labile*  
557 *carbon pools and soil greenhouse gas emissions in Chinese chestnut stands*, Zhejiang  
558 A&F University, (2013).

559 70 Xie, D. N., Si, G. Y., Zhang, T., Mulder, J. & Duan, L. Nitrogen deposition increases  
560 N<sub>2</sub>O emission from an N-saturated subtropical forest in southwest China. *Environ Pollut*  
561 **243**, 1818-1824, doi:10.1016/j.envpol.2018.09.113 (2018).

562 71 Li, C. *et al.* Effects of Moso Bamboo (*Phyllostachys edulis*) Expansion and simulated  
563 nitrogen deposition on emission of soil N<sub>2</sub>O and CO<sub>2</sub> in Lushan Mountain. *Acta*  
564 *Pedologica Sinica* **56**, 148-157, doi:10.11766/trxb201804240215 (2019).

565 72 Fan, J. L., Luo, R. Y., McConkey, B. G. & Ziadi, N. Effects of nitrogen deposition and  
566 litter layer management on soil CO<sub>2</sub>, N<sub>2</sub>O, and CH<sub>4</sub> emissions in a subtropical pine  
567 forestland. *Sci Rep-Uk* **10**, 11, doi:10.1038/s41598-020-65952-8 (2020).

568 73 Chen, S. *Effects of simulated nitrogen deposition on N<sub>2</sub>O emission from midsubtropical*  
569 *forest soils*, Fujian Normal University, (2012).

570 74 Zhang, L. *Response of greenhouse gas fluxes to the addition of nitrogen and phosphorus*  
571 *in subtropical fir forest*, Southwest University, (2013).

572 75 Wang, L. *Influence of nitrogen and phosphorus fertilizers on soil N<sub>2</sub>O emissions in*  
573 *Chinese fir plantation ecosystem*, Shandong Normal University, (2015).

574 76 Wang, Y. *The responses of soil carbon and nitrogen greenhouse gas to exogenous*  
575 *nitrogen input and its coupling mechanism in subtropical plantation*, University of  
576 Chinese Academy of Sciences, (2015).

577 77 Wang, J. *Effects of nitrogen and phosphorus addition on greenhouse gas fluxes in*  
578 *Chinese fir plantations in south China*, University of Chinese Academy of Sciences,  
579 (2016).

580 78 Wang, L. *et al.* Effects of inputs of exogenous NH<sub>4</sub><sup>+</sup> and NO<sub>3</sub><sup>-</sup> on soil nitrous oxide  
581 emission in subtropical plantation, south China. *Acta Pedologica Sinica*, 724-734,  
582 doi:10.11766/trxb201507280291 (2016).

583 79 Wang, Y. S. *et al.* Relationships between ammonia-oxidizing communities, soil methane  
584 uptake and nitrous oxide fluxes in a subtropical plantation soil with nitrogen enrichment.  
585 *Eur J Soil Biol* **73**, 84-92, doi:10.1016/j.ejsobi.2016.01.008 (2016).

586 80 Dang, X. *Study on the responses of soil carbon and nitrogen contents and fluxes to*  
587 *increased atmospheric nitrogen deposition in the subtropical plantation based on field*  
588 *observation and modeling*, University of Chinese Academy of Sciences, (2015).

589 81 Li, X. *Contrasting responses of soil nitrous oxide emission and functional microbial*  
590 *communities to NO<sub>3</sub><sup>-</sup> and NH<sub>4</sub><sup>+</sup> enrichment in the subtropical slash pine plantation,*  
591 *southern China*, University of Chinese Academy of Sciences, (2017).

592 82 Li, X. Y. *et al.* The contrasting effects of deposited NH<sub>4</sub><sup>+</sup> and NO<sub>3</sub><sup>-</sup> on soil CO<sub>2</sub>, CH<sub>4</sub>  
593 and N<sub>2</sub>O fluxes in a subtropical plantation, southern China. *Ecol Eng* **85**, 317-327,  
594 doi:10.1016/j.ecoleng.2015.10.003 (2015).

595 83 Sun, F. & Zhang, L. Response of N<sub>2</sub>O fluxes to the addition of nitrogen and phosphorus  
596 in a southern subtropical fir forest. *Journal of Southwest University (Natural Science*  
597 *Edition)* **37**, 106-111 (2015).

598 84 Wu, D. *Effects of N deposition on soil microbial community structure and greenhouse*  
599 *gas fluxes in a natural Castanopsis carlesii forest* Master's thesis, Fujian Normal  
600 University, (2018).

601 85 Yuan, L. *Effects of simulated atmospheric nitrogen deposition on the exchange fluxes of*  
602 *greenhouse gases in the subtropical forest soil*, Nanjing Normal University, (2016).

603 86 Cai, Y. *The effects of nitrogen deposition on nitrogen dynamics and emissions of*  
604 *greenhouse gases in artificial young forest soil*, South China University of Technology,  
605 (2013).

606 87 Mo, J., Fang, Y., Lin, E. & Li, Y.-E. Soil N<sub>2</sub>O emission and its response to simulated N  
607 deposition in the main forests of Dinghushan in subtropical China. *Journal of Plant*  
608 *Ecology* **30**, 901-910, doi:10.17521/cjpe.2006.0114 (2006).

609 88 Gao, W., Yang, H., Li, S. & Kou, L. Responses of Soil CO<sub>2</sub>, CH<sub>4</sub> and N<sub>2</sub>O Fluxes to N,  
610 P, and Acid Additions in Mixed Forest in Subtropical China. *Journal of Resources and*  
611 *Ecology* **8**, 154-164 (2017).

612 89 Chen, H. *et al.* Nitrogen saturation in humid tropical forests after 6 years of nitrogen and  
613 phosphorus addition: hypothesis testing. *Funct Ecol* **30**, 305-313, doi:10.1111/1365-  
614 2435.12475 (2016).

615 90 Zhang, W. *et al.* Responses of nitrous oxide emissions to nitrogen and phosphorus  
616 additions in two tropical plantations with N-fixing vs. non-N-fixing tree species.  
617 *Biogeosciences* **11**, 4941-4951, doi:10.5194/bg-11-4941-2014 (2014).

618 91 Hong, P. *Effects of nitrogen addition on soil greenhouse gas emissions and microbial*  
619 *community structure in young plantations of different tree species in subtropical China*,  
620 Chinese Academy of Forestry, (2015).

621 92 Zhang, K. *et al.* Influence of N addition on growth and non-growth season soil  
622 greenhouse gas fluxes in a Eucalyptus plantation. *Chinese Journal of Ecology* **34**, 1779-  
623 1784 (2015).

624 93 Li, R. *et al.* Effects of nitrogen application on soil greenhouse gas fluxes in a Eucalyptus  
625 plantation during the growing season. *Acta Ecologica Sinica* **35**, 5931-5939 (2015).

626 94 Li, R. *et al.* Effects of nitrogen application on soil greenhouse gas fluxes in Eucalyptus  
627 plantations with different soil organic carbon content. *Environmental Science* **35** (2014).

628 95 Yang, M. *Impacts of nitrogen fertilization on soil nutrient contents and greenhouse gas*  
629 *fluxes in Eucalyptus plantations during growing season*, Henan Science and Technology  
630 University, (2015).

631 96 Zhang, K. *et al.* Impact of nitrogen fertilization on soil-atmosphere greenhouse gas  
632 exchanges in eucalypt plantations with different soil characteristics in southern China.  
633 *Plos One* **12**, doi:10.1371/journal.pone.0172142 (2017).

634 97 Yan, Y. *Fluxes of CH<sub>4</sub> and N<sub>2</sub>O from soil under tropical seasonal rain forest and rubber*  
635 *plantation, and their stem respiration in Xishuangbanna, SW China*, Xishuangbanna  
636 Tropical Botanical Garden, Chinese Academy of Sciences, (2006).

637 98 Zhou, W. J. *et al.* The effects of nitrogen fertilization on N<sub>2</sub>O emissions from a rubber  
638 plantation. *Sci Rep-Uk* **6**, doi:10.1038/srep28230 (2016).

639 99 Wang, F. M. *et al.* Nitrogen and phosphorus addition impact soil N<sub>2</sub>O emission in a  
640 secondary tropical forest of South China. *Sci Rep-Uk* **4**, doi:10.1038/srep05615 (2014).

641 100 Koehler, B., Corre, M. D., Veldkamp, E., Wullaert, H. & Wright, S. J. Immediate and  
642 long-term nitrogen oxide emissions from tropical forest soils exposed to elevated  
643 nitrogen input. *Global Change Biol* **15**, 2049-2066, doi:10.1111/j.1365-  
644 2486.2008.01826.x (2009).

645 101 Corre, M. D., Sueta, J. P. & Veldkamp, E. Nitrogen-oxide emissions from tropical forest  
646 soils exposed to elevated nitrogen input strongly interact with rainfall quantity and  
647 seasonality. *Biogeochemistry* **118**, 103-120, doi:10.1007/s10533-013-9908-3 (2014).

648 102 Hall, S. J., Asner, G. P. & Kitayama, K. Substrate, climate, and land use controls over  
649 soil N dynamics and N-oxide emissions in Borneo. *Biogeochemistry* **70**, 27-58,  
650 doi:10.1023/B:BI0G.0000049335.68897.87 (2004).

651 103 Tamale, J. *et al.* Nutrient limitations regulate soil greenhouse gas fluxes from tropical  
652 forests: evidence from an ecosystem-scale nutrient manipulation experiment in Uganda.  
653 *Soil-Germany* **7**, 433-451, doi:10.5194/soil-7-433-2021 (2021).

654 104 Aini, F. K., Hergoualc'h, K., Smith, J. U. & Verchot, L. Nitrous oxide emissions along a  
655 gradient of tropical forest disturbance on mineral soils in Sumatra. *Agriculture,*  
656 *Ecosystems & Environment* **214**, 107-117, doi:10.1016/j.agee.2015.08.022 (2015).

657 105 Muller, A. K., Matson, A. L., Corre, M. D. & Veldkamp, E. Soil N<sub>2</sub>O fluxes along an  
658 elevation gradient of tropical montane forests under experimental nitrogen and  
659 phosphorus addition. *Frontiers in Earth Science* **3**, doi:10.3389/feart.7015.00066 (2015).
